# Supplementary material for: Stressverarbeitungsfragebogen für Kinder und Jugendliche (SVF-KJ)
Source: Atypon-hosted journal article supplement (doi:10.1026/0012-1924/a000196), 2017-11-21
Supplement: 0012-1924_a000196_esm1.pdf [file 0012-1924_a000196_esm1.pdf]

*Elektronisches Supplement 1.* Gegenüberstellung der vier modifizierten Items in der zweiten Auflage des Stressverarbeitungsfragebogens für Kinder und Jugendliche (SVF-KJ; Hampel & Petermann, 2016)

| Subtest                         | Item der 1. Auflage                                                                                  | Item der 2. Auflage                                                                      |
|---------------------------------|------------------------------------------------------------------------------------------------------|------------------------------------------------------------------------------------------|
| Ablenkung                       | ...lese ich etwas, was mir Spaß macht!                                                               | ...mache ich etwas, was mir Spaß macht!                                                  |
| Gedankliche Weiterbeschäftigung | ...fällt es mir schwer, an etwas anderes zu denken!                                                  | muss ich immer wieder über die Situation nachdenken!                                     |
| Aggression                      | ...zanke ich mich schnell mit jemandem der mir über den Weg läuft!<br>...nörgele ich an allem herum! | ...bekomme ich schneller Streit mit jemandem!<br>...habe ich an allem etwas auszusetzen! |
