# Supplementary material for: Stressverarbeitungsfragebogen für Kinder und Jugendliche (SVF-KJ)
Source: Atypon-hosted journal article supplement (doi:10.1026/0012-1924/a000196), 2017-11-21
Supplement: 0012-1924_a000196_esm2.pdf [file 0012-1924_a000196_esm2.pdf]

*Elektronisches Supplement 2.* Geschlechts- und Klassenstufenverteilung der Normierungsstichprobe 2 (links) und der Teilstichprobe (rechts) des SVF-KJ

| Klassenstufe | Geschlecht |          | $\Sigma$ | Klassenstufe | Geschlecht |          | $\Sigma$ |
|--------------|------------|----------|----------|--------------|------------|----------|----------|
|              | männlich   | weiblich |          |              | männlich   | weiblich |          |
| 3./4.        | 108        | 108      | 216      |              |            |          |          |
| 5./6.        | 158        | 185      | 343      | 5.           | 61         | 70       | 131      |
| 7./8.        | 171        | 171      | 342      | 7.           | 64         | 45       | 109      |
| 9.           | 92         | 94       | 186      | 9.           | 61         | 73       | 134      |
| $\Sigma$     | 529        | 558      | 1 087    | $\Sigma$     | 529        | 558      | 374      |
