# Supplementary material for: Stressverarbeitungsfragebogen für Kinder und Jugendliche (SVF-KJ)
Source: Atypon-hosted journal article supplement (doi:10.1026/0012-1924/a000196), 2017-11-21
Supplement: 0012-1924_a000196_esm3.pdf [file 0012-1924_a000196_esm3.pdf]

*Elektronisches Supplement 3.* Übersicht über die Fit-Indizes der konfirmatorischen Faktorenanalysen der Items für die verschiedenen Klassenstufen (situationsübergreifende Items)

| Fit-Index                    | Klasse 3 und 4 ( <i>n</i> = 216) | Klasse 5 und 6 ( <i>n</i> = 343) | Klasse 7 und 8 ( <i>n</i> = 342) | Klasse 9 ( <i>n</i> = 186) |
|------------------------------|----------------------------------|----------------------------------|----------------------------------|----------------------------|
| $\chi^2$ -Test ( <i>df</i> ) | 836.53 (558)***                  | 1 016.67 (558) ***               | 1 018.89 (558) ***               | 1 049.74 (558) ***         |
| CFI                          | .92                              | .94                              | .94                              | .89                        |
| RMSEA (90 % KI)              | .05 (.04–.06)                    | .05 (.04–.05)                    | .05 (.04–.05)                    | .07 (.06–.08)              |
| SRMR                         | .07                              | .05                              | .06                              | .07                        |

*Anmerkungen:* Für die situationsübergreifende Analyse wurde zunächst über die jeweils 36 situationsspezifischen Itemmittelwerte gemittelt und daraufhin wurden die situationsaggregierten 36 Itemmittelwerte faktorisiert. CFI = Comparative Fit Index, RMSEA = Root Mean Square Error of Approximation, KI = Konfidenzintervall, SRMR = Standardized Root Mean Square Residual. \*\*\* *p* < .001.
