# Supplementary material for: Stressverarbeitungsfragebogen für Kinder und Jugendliche (SVF-KJ)
Source: Atypon-hosted journal article supplement (doi:10.1026/0012-1924/a000196), 2017-11-21
Supplement: 0012-1924_a000196_esm4.pdf [file 0012-1924_a000196_esm4.pdf]

*Elektronisches Supplement 4.* Korrelationsmatrix der situationsübergreifenden Subtests des SVF-KJ und der Subtests des FEEL-KJ zur Konstruktvalidierung ( $N = 513$ ; auf Klassenebene zentrierte Mittelwerte)

| Subtest des FEEL-KJ <sup>a,b</sup> | Subtest des SVF-KJ |            |            |            |            |            |            |            |            |
|------------------------------------|--------------------|------------|------------|------------|------------|------------|------------|------------|------------|
|                                    | BAG                | ABL        | STK        | POS        | SUB        | VER        | GED        | RES        | AGG        |
| Wut: Adaptiv                       | <b>.54</b>         | <b>.59</b> | <b>.61</b> | <b>.67</b> | <b>.61</b> | -.30       | -.19       | -.29       | -.34       |
| Wut: Mal                           | -.15               | .12        | .14        | -.06       | .01        | <b>.51</b> | <b>.74</b> | <b>.63</b> | <b>.53</b> |
| Angst: Adaptiv                     | <b>.49</b>         | .36        | <b>.51</b> | <b>.56</b> | .44        | -.15       | -.19       | -.17       | -.11       |
| Angst: Mal                         | -.26               | .16        | .09        | -.22       | -.02       | <b>.45</b> | <b>.45</b> | <b>.54</b> | <b>.49</b> |
| Trauer: Adaptiv                    | <b>.49</b>         | .36        | <b>.52</b> | <b>.58</b> | .38        | -.18       | -.13       | -.23       | -.19       |
| Trauer: Mal                        | -.16               | .03        | .02        | -.02       | -.18       | .41        | <b>.48</b> | .39        | .41        |

*Anmerkungen:* Für die situationsübergreifende Analyse wurde zunächst über die jeweils 36 situationsspezifischen Itemmittelwerte gemittelt und daraufhin wurden die situationsaggregierten 36 Itemmittelwerte faktorisiert. BAG = Bagatellisieren, ABL = Ablenkung, STK = Situationskontrolle, POS = Positive Selbstinstruktionen, SUB = Soziales Unterstützungsbedürfnis, VER = Passive Vermeidung, GED = Gedankliche Weiterbeschäftigung, RES = Resignation, AGG = Aggression. Adaptiv = Adaptive Emotionsregulation, Mal = Maladaptive Emotionsregulation.

<sup>a</sup>  $r \geq .11$ ,  $p < .01$ . <sup>b</sup>  $r \geq .45$  sind fett gedruckt.
