# Supplementary material for: Stressverarbeitungsfragebogen für Kinder und Jugendliche (SVF-KJ)
Source: Atypon-hosted journal article supplement (doi:10.1026/0012-1924/a000196), 2017-11-21
Supplement: 0012-1924_a000196_esm5.pdf [file 0012-1924_a000196_esm5.pdf]

*Elektronisches Supplement 5. Oblimin-rotierte Ladungsmatrix einer Hauptachsenanalyse der neun situationsübergreifenden Subtests des SVF-KJ mit  $a \geq .10$  für  $N = 374$*

| Subtest (Abkürzung)                    | F1         | F2         | F3         | $h^2$ | $a_1^2/h^2$ | $a_2^2/h^2$ | $a_3^2/h^2$ | $a_i^2 - a_j^2/h^2$ |
|----------------------------------------|------------|------------|------------|-------|-------------|-------------|-------------|---------------------|
| Bagatellisierung (BAG)                 | -          | -          | <b>.72</b> | .55   | .00         | .00         | <b>.94</b>  | .94                 |
| Ablenkung (ABL)                        | .10        | -          | <b>.55</b> | .33   | .03         | .00         | <b>.92</b>  | .89                 |
| Situationskontrolle (STK)              | <b>.92</b> | -          | -          | .89   | <b>.95</b>  | .00         | .00         | .95                 |
| Positive Selbstinstruktionen (POS)     | <b>.60</b> | -.26       | .34        | .79   | <b>.46</b>  | .09         | .15         | .31                 |
| Soziales Unterstützungsbedürfnis (SUB) | <b>.55</b> | -          | .13        | .37   | <b>.82</b>  | .00         | .05         | .77                 |
| Passive Vermeidung (VER)               |            | <b>.89</b> | .17        | .74   | .00         | <b>.99</b>  | .04         | .96                 |
| Gedankliche Weiterbeschäftigung (GED)  | .35        | <b>.68</b> | -.24       | .59   | .20         | <b>.78</b>  | .10         | .58                 |
| Resignation (RES)                      | -.24       | <b>.76</b> | -          | .68   | .16         | <b>.85</b>  | .00         | .69                 |
| Aggression (AGG)                       | -.10       | <b>.66</b> | -          | .51   | .02         | <b>.85</b>  | .00         | .83                 |
| Eigenwert                              | 3.70       | 1.82       | 1.08       |       |             |             |             |                     |
| Varianz (%)                            | 41.10      | 20.20      | 12.01      | 73.31 |             |             |             |                     |

*Anmerkungen:* Faktorladungen ( $a$ ) mit  $a \geq .50$  sind fett gedruckt. Eigenwerte und Varianzaufklärung für die unrotierte Ladungsmatrix. Weitere Eigenwerte: 0.64, 0.55, 0.46.  $h^2$  = Kommunalität,  $a^2/h^2$  = relativer Anteil der jeweiligen Ladung an der Kommunalität,  $a_i^2 - a_j^2/h^2$  = Differenz der beiden benachbarten Ladungen relativiert an der Kommunalität. Für die situationsübergreifende Analyse wurde zunächst über die jeweils 36 situationspezifischen Itemmittelwerte gemittelt und daraufhin wurden die situationsaggregierten 36 Itemmittelwerte faktorisiert.
